# Supplementary material for: Large d33and enhanced ferroelectric/dielectric properties of poly(vinylidene fluoride)-based composites filled with Pb(Zr0.52Ti0.48)O3nanofibers
Source: Royal Society of Chemistry journal article supplement (doi:10.1039/c5ra07932b), 2015-01-01
Supplement: c5ra07932b1.pdf [file c5ra07932b1.pdf]

### Supporting information

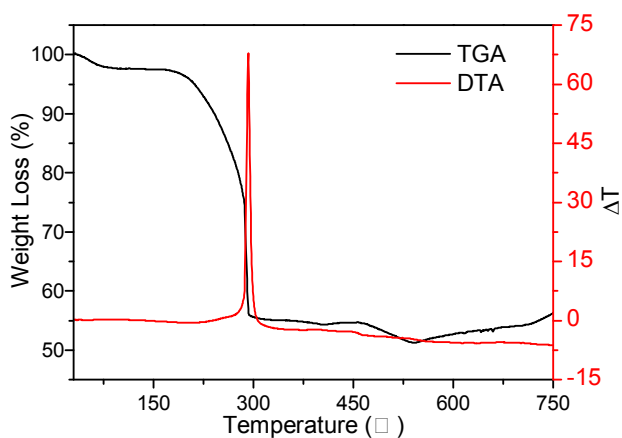

**Fig. S1** TGA and DTA curves of the PZT green fiber mats

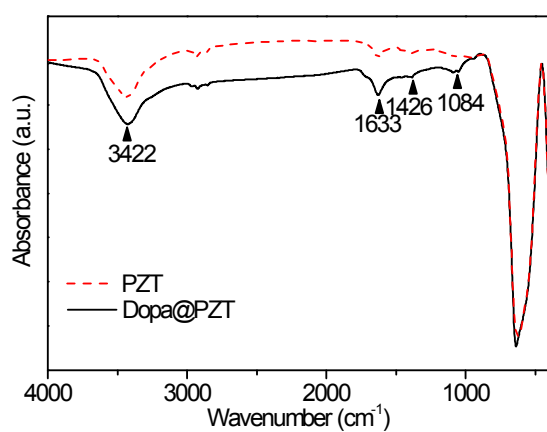

**Fig. S2** FT-IR spectra of the PZT nanofibers before (dashed line) and after (solid line) dopamine modification processing.
